# Supplementary material
Source: PubMed Central journal article supplement (PMC11029773)
Supplement: 262_2010_938_MOESM1_ESM.pdf [file 262_2010_938_MOESM1_ESM.pdf]

**A long peptide from MELOE-1 contains multiple HLA class II T cell epitopes in addition to the HLA-A\*0201 epitope: an attractive candidate for melanoma vaccination**

**Cancer Immunology, Immunotherapy**

**Anne Rogel<sup>1</sup>, Virginie Vignard<sup>2</sup>, Mathilde Bobinet<sup>1</sup>, Nathalie Labarrière<sup>1</sup>, François Lang<sup>1,3</sup>**

<sup>1</sup> Inserm U892, Cancer Research Center Nantes-Angers, 8 Quai Moncousu, BP70721, 44007 Nantes cedex 1 France

<sup>2</sup> CHU of Nantes, 44093 Nantes, France

<sup>3</sup> Université de Nantes, Pharmacology department, UFR des Sciences pharmaceutiques, 1 rue Gaston Veil, 44035 Nantes, France

Pr F. Lang, [francois.lang@univ-nantes.fr](mailto:francois.lang@univ-nantes.fr)

## Online Resource 1

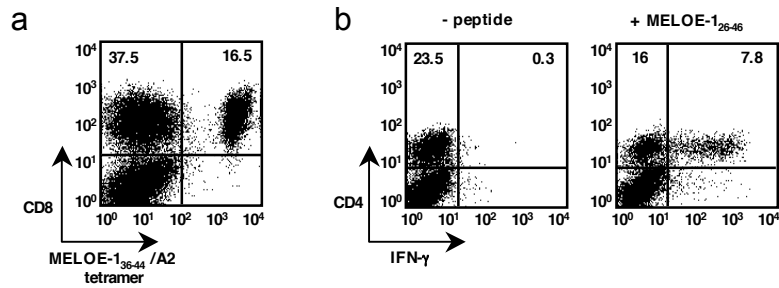

Representative examples of CD8<sup>+</sup> and CD4<sup>+</sup> T cell expansions after stimulation of PBMC from a healthy HLA-A\*0201 donor with MELOE-1<sub>36-44</sub> (a) and MELOE-1<sub>26-46</sub> (b).

CD8<sup>+</sup> specific T lymphocytes were detected by staining with a MELOE-1<sub>36-44</sub> /A2 tetramer and CD4<sup>+</sup> specific T cells were detected by their IFN- $\gamma$  production following restimulation with peptide.

Online Resource 2. Cytokine production by CD4<sup>+</sup> T cell clones 1A3 and 1C9<sup>a</sup>

|            | Clone        | TNF- $\alpha$    | IFN- $\gamma$ | IL-2 | GM-CSF | IL-4 | IL-5 | IL-13 | IL-10 | TGF- $\beta$ | IL-17A | IL-17F |
|------------|--------------|------------------|---------------|------|--------|------|------|-------|-------|--------------|--------|--------|
| <b>1A3</b> | unstimulated | 0.2 <sup>b</sup> | 0             | 0    | 0      | 0.1  | 0    | 0.2   | 0     | 0            | 0.3    | 0.3    |
|            | stimulated   | 85.7             | 94.9          | 25.2 | 68.3   | 17.3 | 0.4  | 38.4  | 0     | 0            | 0.4    | 0.6    |
| <b>1C9</b> | unstimulated | 0                | 0.1           | 0    | 0.2    | 0.4  | 0.4  | 0.7   | 0     | 0            | 0.3    | 0.4    |
|            | stimulated   | 88.2             | 81.7          | 20.4 | 42.6   | 17.1 | 0.1  | 38.6  | 0     | 0            | 0.3    | 0.4    |

<sup>a</sup> CD4<sup>+</sup> T cell clones 1A3 and 1C9 were stimulated for 5 hours with immobilized anti-CD3 mAb (or PMA / ionomycin for IL-17 production) and their cytokine production was assessed by intracellular staining and flow cytometry.

<sup>b</sup> percentage of positive cells

### Online Resource 3

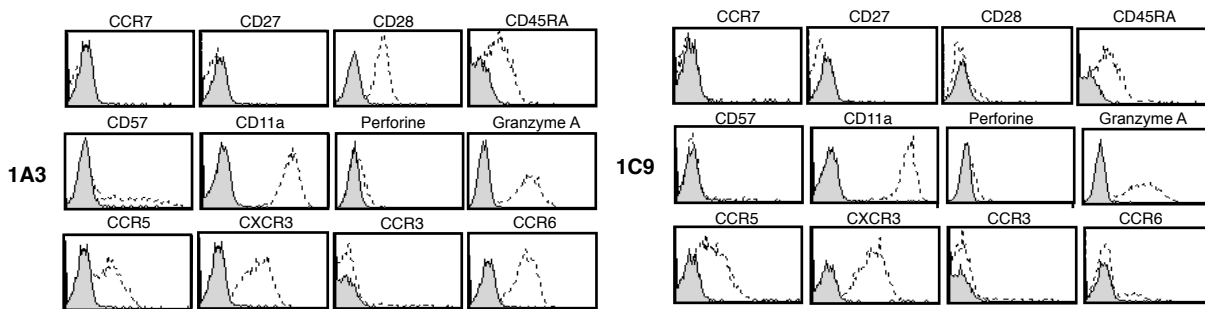

Expression of classical markers differentiating naive vs memory T cells (CCR7, CD27, CD28, CD45RA, CD57, CD11a, perforine, Granzyme A) and Th1 vs Th2 CD4<sup>+</sup> T cells (CCR5, CXCR3, CCR3, CCR6) were analyzed by flow cytometry.
